# Supplementary material for: Intensive Insulin Therapy in the Medical ICU
Source: Atypon-hosted journal article supplement (doi:10.1056/nejmoa052521), 2006-02-02
Supplement: nejm_vandenberghe_449sa1.pdf [file nejm_vandenberghe_449sa1.pdf]

## Supplementary Appendix

This appendix has been provided by the authors to give readers additional information about their work.

Supplement to: Van den Berghe G, Wilmer A, Hermans G, et al. Intensive insulin therapy in the medical ICU. *N Engl J Med* 2006;354:449-61.

**Table A.** Nutritional intake, insulin dose and blood glucose control

|                                                                     | Intention to treat group (N=1200) |             |          | Long-stayers (in ICU 3 days) (N=767) |             |          |
|---------------------------------------------------------------------|-----------------------------------|-------------|----------|--------------------------------------|-------------|----------|
|                                                                     | Conventional                      | Intensive   | P- value | Conventional                         | Intensive   | P- value |
| <b>Nutrition</b>                                                    |                                   |             |          |                                      |             |          |
| Mean daily caloric intake (kcal/day) (M±SD)                         | 1238 ± 564                        | 1202 ± 546  | 0.3      | 1503 ± 370                           | 1451 ± 371  | 0.1      |
| Mean daily amount of nutritional protein (g/day) (M±SD)             | 42 ± 24                           | 40 ± 23     | 0.2      | 53 ± 17                              | 51 ± 16     | 0.03     |
| Mean daily amount of nutritional lipids (g/day) (M±SD)              | 46 ± 26                           | 44 ± 25     | 0.3      | 57 ± 19                              | 55 ± 19     | 0.2      |
| Mean daily amount of nutritional carbohydrates (g/day) (M±SD)       | 190 ± 86                          | 187 ± 83    | 0.5      | 228 ± 59                             | 221 ± 61    | 0.2      |
| <b>Insulin therapy</b>                                              |                                   |             |          |                                      |             |          |
| Number of patients treated with insulin - No (%)                    | 426 (70%)                         | 580 (98%)   | < 0.001  | 323 (84.8%)                          | 385 (99.7%) | < 0.001  |
| Insulin dose - IU / ICU day (Median - IQR)                          | 10 (0-38)                         | 59 (37-86)  | < 0.001  | 18 (3-44)                            | 68 (49-96)  | < 0.001  |
| <b>Blood glucose control</b>                                        |                                   |             |          |                                      |             |          |
| Mean morning blood glucose (mg/dl) (M±SD)                           | 153 ± 31                          | 111 ± 29    | < 0.001  | 156 ± 25                             | 108 ± 26    | < 0.001  |
| Mean morning blood glucose (mg/dl) (M±SD) when on insulin           | 161 ± 28                          | 110 ± 30    | < 0.001  | 160 ± 24                             | 108 ± 26    | < 0.001  |
| Mean morning blood glucose (mg/dl) (M±SD) in patients with diabetes | 168 ± 32                          | 120 ± 37    | < 0.001  | 170 ± 24                             | 115 ± 34    | < 0.001  |
| <b>Hypoglycemia</b>                                                 |                                   |             |          |                                      |             |          |
| Patients experiencing hypoglycemia* - No (%)                        | 19 (3.1%)                         | 111 (18.7%) | < 0.001  | 15 (3.9%)                            | 97 (25.1%)  | < 0.001  |
| Patients experiencing 2 or more hypoglycemic events - No (%)        | 5 (0.8%)                          | 23 (3.9%)   | < 0.001  | 3 (0.8%)                             | 22 (5.7%)   | < 0.001  |
| Level of blood glucose during hypoglycemia (mg/dl) (M±SD)           | 31 ± 8                            | 32 ± 5      | 0.5      | 31 ± 8                               | 32 ± 5      | 0.7      |
